# Supplementary material for: Multiple new cryptic pathogenic Phytophthora species from Fagaceae forests in Austria, Italy and Portugal
Source: PubMed Central journal article supplement — IMA Fungus. 2017 Sep 28;8(2):219–44. doi: 10.5598/imafungus.2017.08.02.02 (PMC5729710; doi:10.5598/imafungus.2017.08.02.02), 2017-09-28
Supplement: ima-8-219-SD1.pdf [file ima-8-219-SD1.pdf]

# Supplementary Table 1

**Supplementary Table 1.** Details of isolates from *Phytophthora* and *Nothophytophthora* considered in the phylogenetic, morphological, growth-temperature and pathogenicity studies. GenBank numbers for sequences obtained in the present study are printed in italics. GenBank numbers for sequences used in the multigene phylogenetic analyses are printed in bold type.

| Species                                                  | Isolate numbers                        |                   | Origin                           |                           | GenBank accession numbers                         |                 |                 |                 |                 |                 |  |
|----------------------------------------------------------|----------------------------------------|-------------------|----------------------------------|---------------------------|---------------------------------------------------|-----------------|-----------------|-----------------|-----------------|-----------------|--|
|                                                          | International collections <sup>a</sup> | Local collections | Host                             | Location; year            | Collector; reference                              | ITS             | Btub            | HSP90           | Cox1            | NADH1           |  |
| <b><i>Nothophytophthora amphigynosa</i></b> <sup>b</sup> | CBS 142348                             | BD268             | Stream baiting; atlantic forest  | Portugal; 2015            | T. Jung; Jung <i>et al.</i> 2017c                 | <b>KY788382</b> | <b>KY788515</b> | <b>KY788555</b> | KY788473        | <b>KY788596</b> |  |
| <i>Phytophthora arenaria</i> <sup>c</sup>                | IMI 389663                             | VHS 10154         | <i>Banksia littoralis</i>        | Australia (WA); 2002      | VHS; Rea <i>et al.</i> ((2011))                   | EU301114        | KJ372298        | KJ396725        | KJ396697        | n.a.            |  |
| <i>P. arenaria</i> <sup>c</sup>                          |                                        | VHS 19931         | <i>Banksia attenuata</i>         | Australia (WA); 2008      | VHS; Rea <i>et al.</i> ((2011))                   | HQ013217        | KJ372293        | KJ396720        | KJ396694        | n.a.            |  |
| <i>P. asparagi</i> <sup>b</sup>                          |                                        | VHS 17644         | <i>Lomandra sonderi</i>          | Australia (WA); 2007      | VHS; Jung <i>et al.</i> ((2011))                  | <b>EU301168</b> | <b>JN547592</b> | <b>HQ012891</b> | HQ012845        | <b>JN547680</b> |  |
| <b><i>P. attenuata</i></b> <sup>b</sup>                  | CBS 141199                             | PD_02752          | <i>Castanopsis carlesii</i>      | Taiwan; 2013              | T. Jung; Jung <i>et al.</i> ((2017b))             | <b>KU517154</b> | <b>KU899277</b> | <b>KU899434</b> | <b>KU517148</b> | <b>KU899519</b> |  |
| <i>P. attenuata</i> <sup>b</sup>                         | CBS 141200                             | TW118             | <i>Chamaecyparis formosensis</i> | Taiwan; 2013              | T. Jung; Jung <i>et al.</i> ((2017b))             | <b>KU899196</b> | <b>KU899274</b> | <b>KU899431</b> | <b>KU899351</b> | <b>KU899516</b> |  |
| <b><i>P. boodjera</i></b> <sup>c</sup>                   | CBS 138637                             | VHS 26806         | Soil dump                        | Australia (WA); 2012      | n.a.; Simamura <i>et al.</i> ((2015))             | KJ372244        | KJ372283        | KJ396710        | KJ396688        | n.a.            |  |
| <b><i>P. boehmeriae</i></b> <sup>b</sup>                 | WPC P6950                              | MG 42-6           | <i>Boehmeria nivea</i>           | Taiwan; 1929              | Sawada; Blair <i>et al.</i> (2008)                | <b>HQ643149</b> | <b>EU080162</b> | <b>EU080165</b> | KT183047        | <b>DQ361200</b> |  |
|                                                          | PD_00181                               | 45F9              |                                  |                           |                                                   |                 |                 |                 |                 |                 |  |
|                                                          | CBS 291.29                             |                   |                                  |                           |                                                   |                 |                 |                 |                 |                 |  |
|                                                          | IMI 180614                             |                   |                                  |                           |                                                   |                 |                 |                 |                 |                 |  |
| <i>P. cactorum</i> <sup>b</sup>                          | WPC P11184                             | P0184             | n.a.                             | Poland; 2003              | L. Orlikowski & G.Szkuta; n.a.                    | <b>FJ801579</b> | <b>EU080292</b> | <b>EU080295</b> | n.a.            | n.a.            |  |
|                                                          | PD_00944                               |                   |                                  |                           |                                                   |                 |                 |                 |                 |                 |  |
| <i>P. cactorum</i> <sup>c</sup>                          | WPC P0715                              | Gallegly N93      | n.a.                             | United Kingdom; 1921      | E. Blackwell; n.a.                                | FJ801258        | EU080285        | EU080288        | n.a.            | n.a.            |  |
|                                                          | PD_00930                               |                   |                                  |                           |                                                   |                 |                 |                 |                 |                 |  |
|                                                          | IMI 21168                              |                   |                                  |                           |                                                   |                 |                 |                 |                 |                 |  |
|                                                          | ATCC 16693                             |                   |                                  |                           |                                                   |                 |                 |                 |                 |                 |  |
| <i>P. cactorum</i> <sup>b</sup>                          |                                        | P6183             | <i>Rubus idaeus</i>              | USA (New York); n.a.      | n.a.; Kroon <i>et al.</i> ((2004))                | n.a.            | AY564052        | n.a.            | AY564167        | <b>AY563994</b> |  |
| <i>P. cactorum</i> <sup>c</sup>                          |                                        | P167              | <i>Mespilus germanica</i>        | Hungary; 2007             | J. Bakonyi; n.a.                                  | EU109566        | EU109575        | n.a.            | n.a.            | EU109581        |  |
| <i>P. cactorum</i> <sup>c</sup>                          |                                        | 414               | Stream water                     | Finland; n.a.             | A. Lijja & J. Hantula; Panek <i>et al.</i> (2016) | LN907642        | n.a.            | n.a.            | LN907701        | n.a.            |  |
| <i>P. capsici</i> <sup>b</sup>                           | RLW2002-MS8                            |                   | <i>Cucurbita</i> sp.             | USA (Massachusetts); n.a. | n.a.; Brazee <i>et al.</i> (2016)                 | KJ631548        | KJ631575        | n.a.            | KJ631596        | <b>KU695492</b> |  |

Supplementary Table 1. (Continued).

| Species                                | Isolate numbers                        |                    | Origin                         |                        | GenBank accession numbers                |          |          |          |          |          |  |
|----------------------------------------|----------------------------------------|--------------------|--------------------------------|------------------------|------------------------------------------|----------|----------|----------|----------|----------|--|
|                                        | International collections <sup>a</sup> | Local collections  | Host                           | Location; year         | Collector; reference                     | ITS      | Btub     | HSP90    | Cox1     | NADH1    |  |
| <i>P. capsici</i> <sup>b</sup>         | WPC P10386                             | OP97               | <i>Cucumis sativus</i>         | USA (Michigan); 1997   | K. Lamour; n.a.                          | HQ261520 | EU079544 | EU079547 | n.a.     | n.a.     |  |
|                                        | PD_00091                               |                    |                                |                        |                                          |          |          |          |          |          |  |
|                                        | CBS 121656                             |                    |                                |                        |                                          |          |          |          |          |          |  |
| <i>P. capsici</i> <sup>c</sup>         | WPC P1319                              |                    | <i>Capsicum annuum</i>         | USA (California); 1983 | L.A. Bower; Robideau et al. (2011)       | HQ261519 | EU079737 | EU079740 | n.a.     | n.a.     |  |
|                                        | PD_00118                               |                    |                                |                        |                                          |          |          |          |          |          |  |
| <i>P. capsici</i> <sup>c</sup>         | ATCC 64808                             |                    |                                |                        |                                          |          |          |          |          |          |  |
|                                        | IMI 352321                             | SCRIP103<br>AR 244 | <i>Piper nigrum</i>            | India; 1989            | n.a.; Cooke et al. 2000                  | AF266787 | DQ361138 | n.a.     | n.a.     | DQ361203 |  |
| <i>P. capsici</i> <sup>c</sup>         |                                        | UQ2819             |                                |                        |                                          |          |          |          |          |          |  |
|                                        |                                        | PD98/9562          | <i>Lycopersicon esculentum</i> | The Netherlands        | n.a.                                     | JX524164 | n.a.     | n.a.     | JX524165 | n.a.     |  |
| <i>P. castaneae</i> <sup>b</sup>       | WPC P10187                             | ICMP 19434         | <i>Castanea crenata</i>        | Japan; 1970            | K. Uchida; Weir et al. (2015)            | HQ261601 | EU080803 | EU080806 | AY564190 | AY564017 |  |
|                                        | PD_00074                               | NRBC 9753          |                                |                        |                                          |          |          |          |          |          |  |
| <i>P. castaneae</i> <sup>c</sup>       | WPC P3389                              |                    | n.a.                           | n.a.                   | n.a.                                     | FJ801842 | EU079815 | EU079818 | n.a.     | n.a.     |  |
|                                        | PD_00128                               |                    |                                |                        |                                          |          |          |          |          |          |  |
| <i>P. castaneae</i> <sup>c</sup>       | IMI 98426                              |                    |                                |                        |                                          |          |          |          |          |          |  |
|                                        | WPC 15598                              | ICMP 19450         | Soil                           | Taiwan; 1979           | H.S. Chang & W.H. Ko; Weir et al. (2015) | HQ643255 | AY564075 | n.a.     | AY564190 | KP295350 |  |
|                                        | CBS 587.85                             |                    |                                |                        |                                          |          |          |          |          |          |  |
|                                        | IMI 325914                             |                    |                                |                        |                                          |          |          |          |          |          |  |
|                                        | ATCC 36818                             |                    |                                |                        |                                          |          |          |          |          |          |  |
| <i>P. castanetorum</i> <sup>bde</sup>  | CBS 142299                             | BD 292             | <i>Castanea sativa</i>         | Portugal; 2015         | T. Jung; this study                      | MF036182 | MF036214 | MF036240 | MF036266 | MF036292 |  |
| <i>P. castanetorum</i> <sup>bde</sup>  |                                        | BD 293             | <i>C. sativa</i>               | Portugal; 2015         | T. Jung; this study                      | MF036183 | MF036215 | MF036241 | MF036267 | MF036293 |  |
|                                        |                                        | BD 336             | <i>C. sativa</i>               | Portugal; 2015         | T. Jung; this study                      | MF036184 | n.a.     | n.a.     | n.a.     | n.a.     |  |
| <i>P. castanetorum</i> <sup>bde</sup>  |                                        | BD 476             | <i>C. sativa</i>               | Portugal; 2015         | T. Jung; this study                      | MF036185 | MF036216 | MF036242 | MF036268 | MF036294 |  |
|                                        |                                        | BD 484             | <i>C. sativa</i>               | Portugal; 2015         | T. Jung; this study                      | MF036186 | MF036217 | MF036243 | MF036269 | MF036295 |  |
| <i>P. castanetorum</i> <sup>cd</sup>   |                                        | BD 485             | <i>C. sativa</i>               | Portugal; 2015         | T. Jung; this study                      | MF036187 | n.a.     | n.a.     | n.a.     | n.a.     |  |
|                                        |                                        | BD 486             | <i>C. sativa</i>               | Portugal; 2015         | T. Jung; this study                      | MF036188 | n.a.     | n.a.     | n.a.     | n.a.     |  |
| <i>P. castanetorum</i> <sup>bdef</sup> | CBS 142300                             | P14                | <i>C. sativa</i>               | Italy (Sardinia); 2014 | B. Scanu & S. Seddaiu; this study        | MF036189 | MF036218 | MF036244 | MF036270 | MF036296 |  |



Supplementary Table 1. (Continued).

| Species                          | Isolate numbers                        |                   | Origin                     |                             | Location; year               | Collector; reference                                      | GenBank accession numbers |          |          |          |          |      |
|----------------------------------|----------------------------------------|-------------------|----------------------------|-----------------------------|------------------------------|-----------------------------------------------------------|---------------------------|----------|----------|----------|----------|------|
|                                  | International collections <sup>a</sup> | Local collections | Host                       | Host                        |                              |                                                           | ITS                       | Btub     | HSP90    | Cox1     | NADH1    |      |
| <i>P. heveae</i> <sup>c</sup>    | WPC P10167                             | p17               | Forest soil                | Forest soil                 | USA (Tennessee); 1964        | W.A. Campbell; n.a.                                       | GU259516                  | EU080796 | EU080799 | n.a.     | n.a.     | n.a. |
|                                  | PD_00073                               | N331              |                            |                             |                              |                                                           |                           |          |          |          |          |      |
|                                  | IMI 131373                             |                   |                            |                             |                              |                                                           |                           |          |          |          |          |      |
|                                  | ATCC 16701                             |                   |                            |                             |                              |                                                           |                           |          |          |          |          |      |
| <i>P. humicola</i> <sup>b</sup>  | WPC P3826                              |                   | Citrus soil                | Citrus soil                 | Taiwan; 1977                 | P.J. Ann & W.H. Ko; Blair et al. 2008; Jung et al. (2011) | HQ643243                  | EU080169 | EU080172 | KF112862 | AY564011 |      |
|                                  | PD_00018                               |                   |                            |                             |                              |                                                           |                           |          |          |          |          |      |
|                                  | CBS 200.81                             |                   |                            |                             |                              |                                                           |                           |          |          |          |          |      |
|                                  | IMI 302303                             |                   |                            |                             |                              |                                                           |                           |          |          |          |          |      |
| <i>P. ilicis</i> <sup>b</sup>    | ATCC 52179                             |                   |                            |                             |                              |                                                           |                           |          |          |          |          |      |
|                                  | WPC P3939                              |                   | <i>Ilex</i> sp.            | <i>Ilex</i> sp.             | Canada; 1988                 | n.a.; Blair et al. 2008                                   | HQ261583                  | EU079860 | EU079863 | AY129172 | n.a.     |      |
|                                  | PD_00133                               |                   | Hickman P22.1.1            |                             |                              |                                                           |                           |          |          |          |          |      |
|                                  | CBS 555.88                             |                   | Atkinson P-89              |                             |                              |                                                           |                           |          |          |          |          |      |
| <i>P. ilicis</i> <sup>b</sup>    | CBS 255.93                             |                   |                            |                             |                              |                                                           |                           |          |          |          |          |      |
|                                  | ATCC 56615                             |                   |                            |                             |                              |                                                           |                           |          |          |          |          |      |
|                                  | CBS 114348                             |                   | <i>Ilex aquifolium</i>     | <i>Ilex aquifolium</i>      | The Netherlands; n.a.        | n.a.                                                      | JX524158                  | n.a.     | n.a.     | AY564186 | AY564013 |      |
|                                  | WPC P6860                              |                   | Hamm 810                   | <i>I. aquifolium</i>        | UK; before 1990              | n.a.                                                      | HQ261580                  | EU080137 | EU080139 | n.a.     | n.a.     |      |
| <i>P. infestans</i> <sup>b</sup> | PD_00178                               |                   |                            |                             |                              |                                                           |                           |          |          |          |          |      |
|                                  | WPC P10651                             |                   | <i>Solanum tuberosum</i>   | <i>Solanum tuberosum</i>    | Uganda; 1998                 | n.a.                                                      | FJ801471                  | EU079633 | EU079636 | n.a.     | n.a.     |      |
|                                  | PD_00103                               |                   |                            |                             |                              |                                                           |                           |          |          |          |          |      |
|                                  | WPC P10650                             |                   | MX980099                   | <i>S. tuberosum</i>         | Mexico; 1998                 | n.a.; Blair et al. 2008                                   | HQ261589                  | EU079626 | EU079629 | n.a.     | n.a.     |      |
| <i>P. infestans</i> <sup>b</sup> | PD_00102                               |                   |                            |                             |                              |                                                           |                           |          |          |          |          |      |
|                                  | -                                      |                   | Pic99186                   | <i>Solanum stoloniferum</i> | Mexico; 1999                 | n.a.                                                      | AY770731                  | AY564035 | n.a.     | AY564150 | AY563977 |      |
|                                  | -                                      |                   | Df98004                    | <i>Solanum tuberosum</i>    | The Netherlands; 1998        | n.a.                                                      | n.a.                      | AY564036 | n.a.     | AY564151 | AY563978 |      |
|                                  | WPC P6195                              |                   | 38E1                       | Soil in Citrus orchard      | Taiwan; 1979                 | P.J. Ann & K.W. Ko; Gallegly & Hong 2008                  | GU259059                  | EU080176 | EU080179 | AY564188 | DQ361206 |      |
| <i>P. intricata</i> <sup>b</sup> | PD_00175                               |                   |                            |                             |                              |                                                           |                           |          |          |          |          |      |
|                                  | CBS 691.79                             |                   |                            |                             |                              |                                                           |                           |          |          |          |          |      |
|                                  | IMI 288805                             |                   |                            |                             |                              |                                                           |                           |          |          |          |          |      |
|                                  | ATCC 38789                             |                   |                            |                             |                              |                                                           |                           |          |          |          |          |      |
| CBS 141211                       |                                        | TW259             | <i>Quercus farokoensis</i> | Taiwan; 2013                | T. Jung; Jung et al. (2017b) | KU517155                                                  | KU899284                  | KU899441 | KU517149 | KU899526 |          |      |



Supplementary Table 1. (Continued).

| Species                                | Isolate numbers                        |                   | Origin                              |                               | GenBank accession numbers                          |          |          |          |          |          |  |
|----------------------------------------|----------------------------------------|-------------------|-------------------------------------|-------------------------------|----------------------------------------------------|----------|----------|----------|----------|----------|--|
|                                        | International collections <sup>a</sup> | Local collections | Host                                | Location; year                | Collector; reference                               | ITS      | Btub     | HSP90    | Cox1     | NADH1    |  |
| <i>P. multivesiculata</i> <sup>c</sup> | WPC P10525                             | PD 95/4744        | <i>Cymbidium</i> sp.                | The Netherlands; 1995         | W. Veenbaas-Rijks; Ilieva <i>et al.</i> 1998       | FJ802101 | EU079588 | EU079591 | n.a.     | n.a.     |  |
|                                        | PD_00097                               |                   |                                     |                               |                                                    |          |          |          |          |          |  |
|                                        | CBS 101594                             |                   |                                     |                               |                                                    |          |          |          |          |          |  |
| <i>P. multivora</i> <sup>b</sup>       | WPC 19594                              | WAC13201          | <i>Eucalyptus marginata</i>         | Australia (WA); n.a.          | VHS; Scott <i>et al.</i> 2009                      | FJ237521 | FJ665260 | KP295296 | FJ237508 | KP295354 |  |
|                                        | PD_02829                               | ICMP19454         |                                     |                               |                                                    |          |          |          |          |          |  |
| <i>P. multivora</i> <sup>b</sup>       | CBS 124094                             | RHS226.2001       | <i>Ceanothus</i> sp.                | UK                            | B. Henricot; Henricot <i>et al.</i> (2014)         | KC855319 | KC855343 | n.a.     | KC855415 | KC855391 |  |
| <i>P. nemorosa</i> <sup>b</sup>        | WPC P19600                             | 41C4              | <i>Notholithocarpus densiflorus</i> | USA (California); before 2003 | E.M. Hansen & P. Reeser; Hansen <i>et al.</i> 2003 | KF317082 | DQ361148 | n.a.     | KF317104 | DQ361211 |  |
|                                        | CBS 114870                             | P13               |                                     |                               |                                                    |          |          |          |          |          |  |
|                                        | ATCC MYA 2948                          | MG 42-7           |                                     |                               |                                                    |          |          |          |          |          |  |
| <i>P. nemorosa</i> <sup>b</sup>        | WPC P10612                             | Gallegly p141     | <i>Umbellularia californica</i>     | USA (California); before 2003 | E.M. Hansen & P. Reeser; Hansen <i>et al.</i> 2003 | FJ801460 | EU079600 | EU079603 | n.a.     | n.a.     |  |
| <i>P. nemorosa</i> <sup>c</sup>        | PD_00099                               | Rizzo 1125        | <i>N. densiflorus</i>               | USA (California); before 2003 | K. Ivors; n.a.                                     | HQ261628 | EU079475 | EU079478 | n.a.     | n.a.     |  |
|                                        | WPC 10288                              |                   |                                     |                               |                                                    |          |          |          |          |          |  |
| <i>P. nicotianae</i> <sup>b</sup>      | PD_00081                               | -                 | <i>Persea americana</i>             | Mexico; 1990                  | B. Tlapai; n.a.                                    | HQ261629 | EU079556 | EU079559 | n.a.     | n.a.     |  |
| <i>P. nicotianae</i> <sup>c</sup>      | WPC P17146                             |                   |                                     |                               |                                                    |          |          |          |          |          |  |
|                                        | PD_00393                               |                   |                                     |                               |                                                    |          |          |          |          |          |  |
| <i>P. nicotianae</i> <sup>c</sup>      | WPC P10802                             | CH 87CM1          | <i>Dianthus caryophyllus</i>        | Japan; 1987                   | n.a.                                               | FJ801517 | EU080716 | EU080719 | n.a.     | n.a.     |  |
|                                        | PD_00007                               | Manuyama1         |                                     |                               |                                                    |          |          |          |          |          |  |
| <i>P. nicotianae</i> <sup>b</sup>      | -                                      | P582              | <i>Nicotiana tabacum</i>            | USA (Kentucky); n.a.          | n.a.; Kroon <i>et al.</i> (2004)                   | n.a.     | AY564081 | n.a.     | AY564196 | AY564023 |  |
| <i>P. nicotianae</i> <sup>c</sup>      | -                                      | STE-U 6273        | <i>Agathosma betulina</i>           | South Africa; 2005            | C.M. Bezuidenhout; Bezuidenhout <i>et al.</i> 2010 | GU902246 | GU191318 | n.a.     | n.a.     | GU191245 |  |
|                                        | -                                      |                   |                                     |                               |                                                    |          |          |          |          |          |  |
| <i>P. nicotianae</i> <sup>c</sup>      | ATCC MYA-4037                          | 22F9              | <i>Nicotiana tabacum</i>            | USA (North Carolina); n.a.    | n.a.; Gallegly & Hong 2008                         | KF317070 | n.a.     | n.a.     | KF317091 | n.a.     |  |
|                                        | CBS 124086                             | P214              | <i>C. lawsoniana</i>                | Hungary; 2007                 | A. Józsa; Józsa <i>et al.</i> 2010                 | GU230789 | GU477613 | KU899389 | GU477617 | GU477619 |  |
| <i>P. palmivora</i> <sup>b</sup>       | WPC P0255                              |                   | <i>Theobroma cacao</i>              | Costa Rica; 1964              | E. Zentmyer & Romero; n.a.                         | HQ261635 | EU080339 | EU080342 | n.a.     | n.a.     |  |
|                                        | PD_00022                               |                   |                                     |                               |                                                    |          |          |          |          |          |  |
| <i>P. palmivora</i> <sup>b</sup>       | ATCC 26200                             |                   |                                     |                               |                                                    |          |          |          |          |          |  |
|                                        | CBS 236.30                             |                   | <i>Cocos nucifera</i>               | India; before 1930            | n.a.                                               | n.a.     | AY564082 | n.a.     | AY564197 | AY564024 |  |



Supplementary Table 1. (Continued).

| Species                             | Isolate numbers                                      |                                 | Origin                                        | Location; year         | Collector; reference                    | GenBank accession numbers |                 |                 |                 |                 |       |
|-------------------------------------|------------------------------------------------------|---------------------------------|-----------------------------------------------|------------------------|-----------------------------------------|---------------------------|-----------------|-----------------|-----------------|-----------------|-------|
|                                     | International collections <sup>a</sup>               | Local collections               |                                               |                        |                                         | Host                      | ITS             | Btub            | HSP90           | Cox1            | NADH1 |
| <i>P. quercina</i> <sup>be</sup>    |                                                      | Beja 5<br>BD549<br>P734         | <i>Q. ilex</i>                                | Portugal; 2010         | T. Jung; this study                     | <b>MF036193</b>           | <b>MF036222</b> | <b>MF036248</b> | <b>MF036274</b> | <b>MF036300</b> |       |
| <i>P. quininea</i> <sup>b</sup>     | WPC P1089<br>WPC P8488<br>CBS 407.48<br>ATCC 46733   | 46C4<br>p386<br>CMW 31062       | <i>Cinchona officinalis</i>                   | Peru; before 1947      | B.S. Crandall; Blair <i>et al.</i> 2008 | <b>HQ643338</b>           | <b>AY564085</b> | n.a.            | AY564200        | <b>AY564027</b> |       |
| <i>P. quininea</i> <sup>b</sup>     | WPC P3247<br>WPC P3608<br>CBS 406.48<br>ATCC 56964   | 45F2<br>p344                    | <i>C. officinalis</i>                         | Peru; before 1947      | B.S. Crandall; n.a.                     | HQ261661                  | EU079803        | <b>EU079805</b> | n.a.            | n.a.            |       |
| <i>P. rubi</i> <sup>b</sup>         | CBS 967.95<br>WPC P16899<br>IMI 355974<br>ATCC 90442 | FVR 11<br>SCR333<br>R49<br>P822 | <i>R. idaeus</i>                              | UK; 1985               | D. Kennedy; Man In't Veld (2007)        | <b>AF139370</b>           | <b>KU899234</b> | <b>KU899391</b> | <b>DQ674736</b> | <b>KU899476</b> |       |
| <i>P. rubi</i> <sup>b</sup>         |                                                      | CH-106<br>P713                  | <i>R. idaeus</i>                              | Sweden; n.a.           | C. Olsson; Jung <i>et al.</i> (2017b)   | <b>KU899180</b>           | <b>KU899256</b> | <b>KU899413</b> | <b>KU899335</b> | <b>KU899498</b> |       |
| <i>P. samsomeana</i> <sup>b</sup>   | n.a.                                                 | n.a.                            | <i>Glycine max</i>                            | China; n.a.            | n.a.; Tang <i>et al.</i> 2010           | FJ966880                  | FJ966879        | n.a.            | FJ966881        | <b>FJ966877</b> |       |
| <i>P. samsomeana</i> <sup>b</sup>   | CBS 117692<br>WPC P3163<br>PD_01115                  | OSU 72                          | <i>Silene latifolia</i><br>subsp. <i>alba</i> | USA (New York); n.a.   | E.M. Hansen; Hansen <i>et al.</i> 2009  | <b>HQ261669</b>           | <b>EU080271</b> | <b>EU080274</b> | n.a.            | n.a.            |       |
| <i>P. stricta</i> <sup>c</sup>      | ATCC MYA-4944                                        | 58A1                            | Nursery irrigation reservoir                  | USA (Virginia); n.a.   | n.a.; Yang <i>et al.</i> (2014)         | KF192694                  | n.a.            | n.a.            | n.a.            | n.a.            |       |
| <i>P. tropicalis</i> <sup>b</sup>   | WPC P10329<br>CBS 434.91<br>PD_00020                 | H245-24                         | <i>Macadamia integrifolia</i>                 | USA (Hawaii); 1975     | M. Aragaki; Blair <i>et al.</i> 2008    | <b>HQ643369</b>           | <b>EU080306</b> | <b>EU080309</b> | n.a.            | n.a.            |       |
| <i>P. tropicalis</i> <sup>b</sup>   |                                                      | AN97/86<br>PD97/11132           | <i>Rosa spp.</i>                              | The Netherlands; 1997  | n.a.                                    | n.a.                      | AY564046        | n.a.            | AY564161        | <b>AY563988</b> |       |
| <i>P. tropicalis</i> <sup>c</sup>   |                                                      | NRCPH-179                       | <i>Citrus sp.</i>                             | India; n.a.            | A.K. Das; n.a.                          | KP698409                  | n.a.            | n.a.            | KP698412        |                 |       |
| <i>P. tropicalis</i> <sup>c</sup>   | WPC P10452<br>PD_00052                               |                                 | Nursery recycling water                       | USA (California); 2002 | D. Ferrin; n.a.                         | n.a.                      | EU080620        | EU080623        | n.a.            | n.a.            |       |
| <i>P. tubulina</i> <sup>b,def</sup> | CBS 141212                                           | TUB 1<br>P736                   | <i>Fagus sylvatica</i>                        | Austria; 2010          | T. Jung; this study                     | <b>MF036196</b>           | <b>MF036225</b> | <b>MF036251</b> | <b>MF036277</b> | <b>MF036303</b> |       |



Supplementary Table 1. (Continued).

| Species                               | Isolate numbers                        |                   | Origin                 |  | GenBank accession numbers |                                     |          |          |          |          |          |  |
|---------------------------------------|----------------------------------------|-------------------|------------------------|--|---------------------------|-------------------------------------|----------|----------|----------|----------|----------|--|
|                                       | International collections <sup>a</sup> | Local collections | Host                   |  | Location; year            | Collector; reference                | ITS      | Btub     | HSP90    | Cox1     | NADH1    |  |
| <i>P. tubulina</i> <sup>bolef</sup>   | CBS 141213                             | TUB 2<br>P737     | <i>F. sylvatica</i>    |  | Austria; 2010             | T. Jung; this study                 | MF036197 | MF036226 | MF036252 | MF036278 | MF036304 |  |
| <i>P. tubulina</i> <sup>boe</sup>     |                                        | TUB 3             | <i>F. sylvatica</i>    |  | Austria; 2010             | T. Jung; this study                 | MF036198 | MF036227 | MF036253 | MF036279 | MF036305 |  |
| <i>P. tubulina</i> <sup>boe</sup>     |                                        | TUB 4             | <i>F. sylvatica</i>    |  | Austria; 2010             | T. Jung; this study                 | MF036199 | MF036228 | MF036254 | MF036280 | MF036306 |  |
| <i>P. tubulina</i> <sup>boe</sup>     |                                        | TUB 5             | <i>F. sylvatica</i>    |  | Austria; 2010             | T. Jung; this study                 | MF036200 | MF036229 | MF036255 | MF036281 | MF036307 |  |
| <i>P. tyrrhenica</i> <sup>bolef</sup> | CBS 142301                             | PH154             | <i>Q. ilex</i>         |  | Italy (Sardinia); 2012    | B. Scanu; this study                | KU899188 | KU899265 | KU899422 | KU899343 | KU899507 |  |
| <i>P. tyrrhenica</i> <sup>boe</sup>   |                                        | PH155             | <i>Q. ilex</i>         |  | Italy (Sardinia); 2012    | B. Scanu; this study                | KU899189 | KU899266 | KU899423 | KU899344 | KU899508 |  |
| <i>P. tyrrhenica</i> <sup>bolef</sup> | CBS 142303                             | PH103             | <i>Quercus suber</i>   |  | Italy (Sardinia); 2012    | B. Scanu and S. Seddaiu; this study | MF036208 | MF036234 | MF036260 | MF036286 | MF036312 |  |
| <i>P. tyrrhenica</i> <sup>bd</sup>    | CBS 142302                             | TYR 1             | <i>Q. ilex</i>         |  | Italy (Sicily); 2015      | T. Jung; this study                 | MF036201 | MF036230 | MF036256 | MF036282 | MF036308 |  |
| <i>P. tyrrhenica</i> <sup>cd</sup>    |                                        | TYR 2             | <i>Q. ilex</i>         |  | Italy (Sicily); 2015      | T. Jung; this study                 | MF036202 | n.a.     | n.a.     | n.a.     | n.a.     |  |
| <i>P. tyrrhenica</i> <sup>bd</sup>    |                                        | TYR 3             | <i>Q. ilex</i>         |  | Italy (Sicily); 2015      | T. Jung; this study                 | MF036203 | MF036231 | MF036257 | MF036283 | MF036309 |  |
| <i>P. tyrrhenica</i> <sup>bd</sup>    |                                        | TYR 4             | <i>Q. ilex</i>         |  | Italy (Sicily); 2015      | T. Jung; this study                 | MF036204 | MF036232 | MF036258 | MF036284 | MF036310 |  |
| <i>P. tyrrhenica</i> <sup>bd</sup>    |                                        | TYR 5             | <i>Q. ilex</i>         |  | Italy (Sicily); 2015      | T. Jung; this study                 | MF036205 | MF036233 | MF036259 | MF036285 | MF036311 |  |
| <i>P. tyrrhenica</i> <sup>cdle</sup>  |                                        | TYR 6             | <i>Q. ilex</i>         |  | Italy (Sicily); 2015      | T. Jung; this study                 | MF036206 | n.a.     | n.a.     | n.a.     | n.a.     |  |
| <i>P. tyrrhenica</i> <sup>cdle</sup>  |                                        | TYR 7             | <i>Q. ilex</i>         |  | Italy (Sicily); 2015      | T. Jung; this study                 | MF036207 | n.a.     | n.a.     | n.a.     | n.a.     |  |
| <i>P. uliginosa</i> <sup>b</sup>      | CBS 109054                             | ULI 1<br>50A2     | <i>Q. robur</i>        |  | Poland; 1998              | T. Jung; Jung <i>et al.</i> (2002)  | AF449495 | EU080012 | EU080014 | KU681023 | KU899471 |  |
|                                       | WPC P10413                             |                   |                        |  |                           |                                     |          |          |          |          |          |  |
|                                       | WPC P16835                             |                   |                        |  |                           |                                     |          |          |          |          |          |  |
|                                       | PD_00157                               |                   |                        |  |                           |                                     |          |          |          |          |          |  |
| <i>P. uliginosa</i> <sup>c</sup>      | CBS 109055                             | ULI 2             | <i>Quercus petraea</i> |  | Germany; 1998             | T. Jung; Jung <i>et al.</i> (2002)  | HQ261722 | EU079693 | EU079696 | n.a.     | n.a.     |  |
|                                       | WPC P10328                             |                   |                        |  |                           |                                     |          |          |          |          |          |  |
|                                       | PD_00012                               |                   |                        |  |                           |                                     |          |          |          |          |          |  |
| <i>P. uniformis</i> <sup>b</sup>      | -                                      | ALN 58<br>P705    | <i>A. glutinosa</i>    |  | Germany; 1998             | T. Jung; Jung <i>et al.</i> (2017b) | KU899173 | KU899249 | KU899406 | KU899328 | KU899491 |  |

Supplementary Table 1. (Continued).

| Species                               | Isolate numbers                         |                   | Origin                             |                           | Location; year                                           | Collector; reference | GenBank accession numbers |          |          |          |       |  |  |
|---------------------------------------|-----------------------------------------|-------------------|------------------------------------|---------------------------|----------------------------------------------------------|----------------------|---------------------------|----------|----------|----------|-------|--|--|
|                                       | International collections <sup>a</sup>  | Local collections | Host                               | GenBank accession numbers |                                                          |                      | ITS                       | Btub     | HSP90    | Cox1     | NADH1 |  |  |
| <i>P. uniformis</i> <sup>b</sup>      | -                                       | P876              | <i>A. glutinosa</i>                | Sweden; 1997              | C. Olsson; Brasier et al. (2004); Jung et al. (2017b)    | KU681016             | KU899260                  | KU899417 | KU681019 | KU899502 |       |  |  |
| <i>P. versiformis</i> <sup>b</sup>    | CBS 142005                              | TP13.46           | <i>C. calophylla</i>               | Australia (WA); 2013      | T. Paap; Paap et al. 2017                                | KX011279             | KX011321                  | KX011256 | KX011222 | KX011302 |       |  |  |
| <i>P. versiformis</i> <sup>b</sup>    | -                                       | PAB11.79          | <i>Corymbia calophylla</i>         | Australia (WA); 2011      | P. Barber; Barber et al. (2013)                          | KC748463             | KX011311                  | KX011260 | KX011225 | KX011308 |       |  |  |
| <i>P. versiformis</i> <sup>b</sup>    | -                                       | TP13.10           | <i>C. calophylla</i>               | Australia (WA); n.a.      | T. Paap; Paap et al. 2017                                | KX011275             | KX011315                  | KX011252 | KX011227 | KX011303 |       |  |  |
| <i>P. versiformis</i> <sup>b</sup>    | -                                       | TP13.29           | <i>C. calophylla</i>               | Australia (WA); 2013      | T. Paap; Paap et al. 2017                                | KX011277             | KX011318                  | KX011254 | KX011220 | KX011299 |       |  |  |
| <i>P. versiformis</i> <sup>b</sup>    | -                                       | TP13.34           | <i>C. calophylla</i>               | Australia (WA); n.a.      | T. Paap; Paap et al. 2017                                | KX011283             | KX011319                  | KX011262 | KX011223 | KX011310 |       |  |  |
| <i>P. vulcanica</i> <sup>bde</sup>    | CBS 141216                              | X3a               | <i>F. sylvatica</i>                | Italy (Sicily); 2013      | T. Jung; this study                                      | MF036209             | MF036235                  | MF036261 | MF036287 | MF036313 |       |  |  |
| <i>P. vulcanica</i> <sup>bde</sup>    | CBS 141217                              | X3b               | <i>F. sylvatica</i>                | Italy (Sicily); 2013      | T. Jung; this study                                      | MF036210             | MF036236                  | MF036262 | MF036288 | MF036314 |       |  |  |
| <i>P. vulcanica</i> <sup>bde</sup>    | -                                       | X3c               | <i>F. sylvatica</i>                | Italy (Sicily); 2013      | T. Jung; this study                                      | MF036211             | MF036237                  | MF036263 | MF036289 | MF036315 |       |  |  |
| <i>P. vulcanica</i> <sup>bdef</sup>   | -                                       | X3d               | <i>F. sylvatica</i>                | Italy (Sicily); 2013      | T. Jung; this study                                      | MF036212             | MF036238                  | MF036264 | MF036290 | MF036316 |       |  |  |
| <i>P. vulcanica</i> <sup>bdef</sup>   | -                                       | X3e               | <i>F. sylvatica</i>                | Italy (Sicily); 2013      | T. Jung; this study                                      | MF036213             | MF036239                  | MF036265 | MF036291 | MF036317 |       |  |  |
| <i>P. xalni</i> <sup>b</sup>          | IMI 392314<br>WPC P16203<br>PD PD_02130 | P772              | <i>A. glutinosa</i>                | UK; 1994                  | G. Mac Askil; Brasier et al. (2004); Jung et al. (2017b) | KU681013             | KU899238                  | KU899395 | KU681017 | KU899480 |       |  |  |
| <i>P. xalni</i> <sup>b</sup>          | -                                       | Reis 2<br>P691    | <i>A. glutinosa</i>                | Germany; 2014             | T. Jung; Jung et al. (2017b)                             | KU899168             | KU899244                  | KU899401 | KU899323 | KU899486 |       |  |  |
| <i>P. xcambivora</i> <sup>bf</sup>    | CBS 141218                              | IT 5-3<br>P711    | <i>Quercus pubescens</i>           | Italy (Sicily); 2013      | T. Jung; Jung et al. (2017b)                             | KU899179             | KU899255                  | KU899412 | KU899334 | KU899497 |       |  |  |
| <i>P. xcambivora</i> <sup>b</sup>     | -                                       | 4044.1            | <i>Chrysolepis chrysophylla</i>    | USA (Oregon); 2001        | A. Saavedra; Saavedra et al. (2007); Jung et al. (2017b) | KU899151             | KU899223                  | KU899378 | KU899306 | KU899463 |       |  |  |
| <i>P. xheterohybrida</i> <sup>b</sup> | CBS 141207                              | P513<br>TW30      | Baiting; tributary of Ha-pen River | Taiwan; 2013              | T. Jung; Jung et al. (2017b)                             | KU517151             | KU899290                  | KU899447 | KU517145 | KU899532 |       |  |  |
| <i>P. xheterohybrida</i> <sup>b</sup> | -                                       | TW32              | Baiting; tributary of Ha-pen River | Taiwan; 2013              | T. Jung; Jung et al. (2017b)                             | KU899210             | KU899292                  | KU899449 | KU899365 | KU899534 |       |  |  |
| <i>P. xincrassata</i> <sup>b</sup>    | CBS 141209                              | TW269             | Baiting; tributary of Ha-pen River | Taiwan; 2013              | T. Jung; Jung et al. (2017b)                             | KU517156             | KU899286                  | KU899443 | KU517150 | KU899528 |       |  |  |

Supplementary Table 1. (Continued).

| Species                                       | Isolate numbers                                           |                   | Origin                                     | Location; year       | Collector; reference                                                      | GenBank accession numbers |          |          |          |          |       |
|-----------------------------------------------|-----------------------------------------------------------|-------------------|--------------------------------------------|----------------------|---------------------------------------------------------------------------|---------------------------|----------|----------|----------|----------|-------|
|                                               | International collections <sup>a</sup>                    | Local collections |                                            |                      |                                                                           | Host                      | ITS      | Btub     | HSP90    | Cox1     | NADH1 |
| <i>P. xincassata</i> <sup>b</sup>             | CBS 141208                                                | TW283             | Baiting; tributary of Ha-pen River         | Taiwan; 2013         | T. Jung; Jung <i>et al.</i> (2017b)                                       | KU899206                  | KU899287 | KU899444 | KU899361 | KU899529 |       |
| <i>P. xmultiformis</i> <sup>b</sup>           | IMI 392316<br>WPC P16202<br>PD PD_01913                   | P770              | <i>A. glutinosa</i>                        | Netherlands; 1994    | H. van Kesteren, Brasier <i>et al.</i> (2004); Jung <i>et al.</i> (2017b) | AF139368                  | KU899239 | KU899396 | KU681018 | KU899481 |       |
| <i>P. xmultiformis</i> <sup>b</sup>           | -                                                         | PAM 396           | <i>A. glutinosa</i>                        | France; 2007         | T. Scordia; Husson <i>et al.</i> (2015); Jung <i>et al.</i> (2017b)       | KU899184                  | KU899261 | KU899418 | KU899339 | KU899503 |       |
| <i>P. sp. ohioensis</i> <sup>b</sup>          | WPC P16050<br>PD PD_01627<br>PD PD_02093<br>ATCC MYA-4452 | ST 18-37          | <i>Quercus alba</i>                        | USA (Ohio); 2006     | Y. Balci; Martin <i>et al.</i> (2014).                                    | HQ261710                  | KX011324 | KX011259 | GU594815 | KX011307 |       |
| <i>P. sp. quercina</i> -like <sup>c</sup>     | ATCC MYA-4090                                             | MN 023            | <i>Quercus rubra</i>                       | USA; 2004            | Y. Balci; Balci <i>et al.</i> (2007)                                      | DQ313224                  | n.a.     | n.a.     | n.a.     | n.a.     |       |
| <i>P. sp. versiformis</i> -like <sup>b</sup>  | -                                                         | MJ5               | <i>C. calophylla</i>                       | Australia (WA); 2013 | L. Croeser; Paap <i>et al.</i> 2017                                       | KX011271                  | KX011325 | KX011248 | KX011216 | KX011296 |       |
| <i>P. sp. versiformis</i> -like <sup>b</sup>  | -                                                         | TP13.14           | <i>C. calophylla</i>                       | Australia (WA); 2013 | T. Paap; Paap <i>et al.</i> 2017                                          | KX011276                  | KX011316 | KX011253 | KX011217 | KX011297 |       |
| <i>P. sp. xcambivora</i> -like <sup>b</sup>   | CBS 111329                                                |                   | <i>Malus pumila</i> var. <i>dulcissima</i> | South Korea; 1996    | H-J. Jee; Jee <i>et al.</i> 1997; Jung <i>et al.</i> (2017b)              | KU899158                  | KU899230 | KU899386 | KU899313 | KU899472 |       |
| <i>P. sp. xmultiformis</i> -like <sup>b</sup> | -                                                         | 4971496<br>P693   | <i>A. glutinosa</i>                        | Netherlands; 2011    | K. Rosendahl & W. Man In 't Veld; Jung <i>et al.</i> (2017b)              | KU899170                  | KU899246 | KU899403 | KU899325 | KU899488 |       |

n.a. = not available; authentic strains, ex-types, isotypes, neotypes and paratypes are printed in bold-type.

<sup>a</sup> Abbreviations of isolates and culture collections: ATCC = American Type Culture Collection, Manassas, USA; CBS = CBS collection at the Westerdijk Fungal Biodiversity Institute (previously Centraalbureau voor Schimmelcultures), Utrecht, Netherlands; IMI = CABI Bioscience, UK; PD = Phytophthora Database (<http://www.phytophthora.org>); VHS = Vegetation Health Service Collection, Department of Environment and Conservation, Perth, Australia; WPC = World Phytophthora Collection, University of California Riverside, USA; other isolate names and numbers are as given by the collectors and on GenBank, respectively.

<sup>b</sup> Isolates used in phylogenetic studies of both multigene sequence alignments and individual genes.

<sup>c</sup> Isolates used only in phylogenetic studies of individual genes.

<sup>d</sup> Isolates used in the morphological studies.

<sup>e</sup> Isolates used in the temperature-growth studies.

<sup>f</sup> Isolates used in the soil infestation trials.
